1

2 **Complete depletion of *Arabidopsis* linker histones**  
3 **impairs the correlations among chromatin**  
4 **compartmentalization, DNA methylation and gene**  
5 **expression**

6

7 **Zhenfei Sun<sup>1,4</sup>, Min Li<sup>2,4</sup>, Yunlong Wang<sup>3</sup>, Hui Zhang<sup>2</sup>, Yu Zhang<sup>1</sup>, Min Ma<sup>1</sup>, Pan**  
8 **Wang<sup>1</sup>, Yaping Fang<sup>3</sup>, Guoliang Li<sup>3</sup> and Yuda Fang<sup>1,2\*</sup>**

9

10 <sup>1</sup>Joint Center for Single Cell Biology, School of Agriculture and Biology, Shanghai Jiao  
11 Tong University, Shanghai 200240, China

12 <sup>2</sup>National key Laboratory of Plant Molecular Genetics, CAS Center for Excellence in  
13 Molecular Plant Sciences, Institute of Plant Physiology and Ecology, Chinese Academy of  
14 Sciences; University of Chinese Academy of Sciences, Shanghai 200032, China

15 <sup>3</sup>National Key Laboratory of Crop Genetic Improvement, Hubei Key Laboratory of  
16 Agricultural Bioinformatics, College of Informatics, Huazhong Agricultural University,  
17 Wuhan, 430070, China

18 <sup>4</sup> These authors contributed equally to this work.

19 \*Corresponding author: [yuda.fang@sjtu.edu.cn](mailto:yuda.fang@sjtu.edu.cn)

20

21

22

23

24 In eukaryotic cells, linker histone H1 anchors in and out ends of  
25 nucleosome DNA to promote chromatin to fold into the 30 nm fiber.  
26 However, if H1 plays a role in coordinating the three-dimensional (3D)  
27 chromatin architecture, DNA methylation, and transcriptional regulation  
28 is not clear. We engineered H1 knockout mutants in *Arabidopsis thaliana*  
29 which shows pleiotropic phenotypes. Using High-throughput  
30 Chromosome Conformation Capture (Hi-C), we found that H1 complete  
31 depletion dampens inter- and intra-chromosomal interactions, as well as  
32 intra- and inter-chromosomal arm interactions. MNase accessibility  
33 assays followed by sequencing (MNase-seq) showed that the  
34 nucleosome density decreases in centromeric regions and increases in  
35 chromosome arms. In contrast, DNA methylation level in CHG and CHH  
36 contexts increases in centromeric regions and decreases in  
37 chromosome arms as revealed by whole genome bisulfite sequencing  
38 (WGBS) in *h1* mutant. Importantly, the functional link between DNA  
39 methylation and gene transcription is defected, and the extensive  
40 switches between chromatin compartment A and B are uncoupled from  
41 genome-wide DNA methylation and most of gene transcriptions upon H1  
42 depletion. These results suggested that linker histone H1 works as  
43 linkers among chromatin compartmentalization, DNA methylation and  
44 transcription.

46 Genomic DNA in eukaryotic cells is densely packaged into chromatin to fit  
47 within the small volume of nucleus. The eukaryotes achieve DNA package  
48 depending on two types of major proteins, the core histones (H2A, H2B, H3  
49 and H4) and the linker histone H1. Two copies of each of the four core histones  
50 wrapped with ~147 bp of DNA termed as nucleosome core particle together  
51 with an additional variable length of linker DNA constitute nucleosome, which  
52 is the repeating structure unit of chromatin (Kornberg 1974; Luger et al. 1997) .  
53 In addition, H1 binds to nucleosome with ~10 bp of DNA at both the entry and  
54 exit sites of nucleosome core particle to facilitate the folding of chromatin into a  
55 30 nm fiber (Bednar et al. 1998; Song et al. 2014; Thoma et al. 1979). H1 is the  
56 most variable histone, with multiple H1 family members are present in different  
57 organisms. For example, mice and human contain H1-coding genes up to  
58 eleven, consisting of seven somatic subtypes and four germ line-specific  
59 subtypes. Deletion of any one or two H1 subtypes did not noticeably affect  
60 mouse development due to the compensatory effect of other subtypes  
61 (Drabent et al. 2000; Fan et al. 2001; Fantz et al. 2001; Lin et al. 2000; Sirotkin  
62 et al. 1995). Elimination of H1c, H1d and H1e led to a decrease in the ratio of  
63 H1 to nucleosome core particle up to 50 % and embryonic lethality. In addition,  
64 deletion of the three H1 subtypes induced the decrease of global nucleosome  
65 spacing, reduction of local chromatin compaction, specific effect on  
66 transcriptions of imprinted or X chromosome genes, massive epigenetic  
67 changes and alteration of topological organization at the most active chromatin

68 domains (Fan et al. 2005; Maclean et al. 2011; Yang et al. 2013).

69 H1s in plants are divided into two groups: the main H1s which are  
70 ubiquitously and stably expressed, and the minor H1s which are  
71 stress-induced and evolutionarily conserved from monocotyledonous to  
72 dicotyledonous plants. The drought stress and abscisic acid (ABA)-inducible  
73 H1 was initially discovered in wild tomato *Solanum pennellii*, followed by its  
74 identification in different organisms, including *Arabidopsis* and *Nicotiana*  
75 *tabacum* (Cohen and Bray 1990; Cohen et al. 1996) . Being different from  
76 mammals, *Arabidopsis* H1 is encoded by only three genes: a  
77 stress-inducible minor variant *H1.3* (*AT2G18050*) and two main variants *H1.1*  
78 (*AT1G06760*) and *H1.2* (*AT2G30620*) (Ascenzi and Gantt 1997; Gantt and  
79 Lenvik 1991; Przewloka et al. 2002). *H1.1* and *H1.2* are distributed in all  
80 vegetative tissues and organs, including leaves, roots, hypocotyls and  
81 meristems, and *H1.3* is detected in constitutive guard cell-specific tissues and  
82 facultative environmentally regulated tissues (Rutowicz et al. 2015).

83 Plant DNA methylation occurs in CG, CHG and CHH sequence contexts  
84 which are primarily catalyzed by DNA methyltransferase 1 (MET1),  
85 chromomethylase 3 (CMT3) and the *de novo* methyltransferase (domains  
86 rearranged methylases, DRMs) (Law and Jacobsen 2010). The majority of  
87 DNA methylation occurs in transposable elements (TEs) in CG, CHG and CHH  
88 contexts and is essential to the inhibition of TE activity. Substantial methylation  
89 is also found in the bodies of active genes, in which generally occurs in CG

90 context (Law and Jacobsen 2010). In *Arabidopsis*, H1 was known to be  
91 involved in DNA methylation and gene transcription. Knockdown of H1 in  
92 *Arabidopsis* causes stochastic changes in both hypo- and hyper-DNA  
93 methylation in a variety of gene contexts (Wierzbicki and Jerzmanowski 2005).  
94 The effect of H1 on DNA methylation has been explained by that DNA  
95 METHYLATION 1 (DDM1) plays a role in removing H1 from chromatin to  
96 facilitate the access of DNA-methylation machinery (Lyons and Zilberman  
97 2017; Rea et al. 2012; Wierzbicki and Jerzmanowski 2005; Zemach et al.  
98 2013). In addition, H1 and DNA methylation jointly repress TEs and aberrant  
99 intragenic transcripts (Choi et al. 2020). The mutation of H1 was known to  
100 affect nucleosome density (Choi et al. 2020; Rutowicz et al. 2019; Willcockson  
101 et al. 2020). Genome-wide nucleosome maps in yeast, animals and plants  
102 revealed that the nucleosome distribution patterns correlate with high-order  
103 chromatin organization and transcription levels (Lee et al. 2004; Li et al. 2014;  
104 Parnell et al. 2008; Sala et al. 2011; Weiner et al. 2010; Yuan et al. 2005).  
105 However, the function of H1 in maintaining high-order chromatin organization  
106 is poorly understood in plant.

107 Hi-C is widely used to map chromatin organization of architectures (Feng et  
108 al. 2014; Liu et al. 2016; Wang et al. 2015), and revealed that the chromatin is  
109 partitioned into different domains based on different scales and compaction  
110 levels, including A/B compartments (Meaburn and Misteli 2007; Wang et al.  
111 2015), TADs (Dixon et al. 2012; Lieberman-Aiden et al. 2009; Nora et al. 2012),

112 and chromatin loops (Jin et al. 2013; Rao et al. 2014). The compartment A for  
113 euchromatin with active transcription and compartment B for heterochromatin  
114 with repressed transcription can be classified in chromatin regions based on  
115 the interaction pattern. There are no obvious TADs, but TAD-like domains in  
116 *Arabidopsis* (Dong et al. 2017; Liu et al. 2017). The smaller structure feature is  
117 chromatin loops which appear at 10 kb to 1 Mb within TADs (Phillips and  
118 Corces 2009) and play roles in transcription, recombination and replication  
119 (Mukherjee and Mukherjea 1988). The studies of *Arabidopsis*  
120 three-dimensional genome revealed that genome doubling modulates the  
121 transcription genome-widely by changed chromatin interactions (Zhang et al.  
122 2019); 3D chromatin organization rearrangement correlates with heat  
123 stress-induced transposon activation (Sun et al. 2020); theme of genome  
124 structure is the formation of structural units correspond to gene bodies (Liu et  
125 al. 2016); KNOT, a structure similar to *flamenco* locus of *Drosophila*, is present  
126 in *Arabidopsis* (Grob et al. 2014); and chromatin interactions are related to  
127 various epigenetic marks in active or inactive chromatin (Feng et al. 2014).

128 Recently, partial (about 50 %) depletion of H1 in mouse embryonic stem  
129 cells was found to cause no significant change in the overall 3D genome  
130 (Geeven et al. 2015); The 3D genome organization is correlated with  
131 chromatin compaction and the epigenetic landscape in mouse partial *h1*  
132 mutants including *h1c/h1d/h1e* triple (Willcockson et al. 2020) and *h1c/h1e*  
133 double mutant (Yusufova et al. 2020). In this study, we generated *Arabidopsis*

134 H1 null mutants, and applied Hi-C and genome-wide approaches to revealing  
135 the roles of H1 in regulating 3D genomic organization, nucleosome distribution,  
136 DNA methylation and transcription. We showed that H1 depletion impairs the  
137 functional links among 3D chromatin interactions, DNA methylation or  
138 transcription. We further revealed that H1 modulates the nucleosome density  
139 and distribution along the chromosomes, which correlate with the changes of  
140 3D chromatin structure, DNA methylation and transcription.

141

## 142 **Results**

### 143 **The phenotypes and transcriptome of *Arabidopsis* linker histone *h1* null** 144 **mutant**

145 To analyze the role of H1 in chromatin organization, we first generated an  
146 *h1.1-1h1.2-1h1.3-1* triple T-DNA insertion line which shows no obvious  
147 developmental defects (Supplemental Fig. S1A, B) and has only slightly  
148 decondensed chromocenters (Supplemental Fig. S1C) as the transcription of  
149 *H1.2* in this mutant with T-DNA inserted in the promoter of *H1.2* is significantly  
150 induced (Supplemental Fig. S1D). We then constructed *h1* null mutants by  
151 crossing *h1.1-1 h1.3-1* double mutant with two CRISPR/Cas9-edited (Feng et  
152 al. 2013; Yan et al. 2015) independent *h1.2* mutants, *h1.2-2* and *h1.2-3*, which  
153 have pre-mature stop codons due to a nucleotide insertion of “G” or “A” in the  
154 second exon of *H1.2*, 949 bp and 906 bp from transcription start site (TSS),  
155 respectively (Supplemental Fig. S1E). To eliminate the potential off-target

156 mutations in the CRRISPR experiments, we compared the phenotypes  
157 between *h1.1-1 h1.2-2 h1.3-1 (h1-1)* and *h1.1-1 h1.2-3 h1.3-1 (h1-2)* with each  
158 of them harboring an independent CRISPR/Cas9-edited *h1.2* mutation, we  
159 found that these two lines show similar phenotypes including decreased  
160 growth and serrated leaves (Fig. 1A, B). For further studies, we used *h1-1*  
161 (named as *h1* hereafter) in which the complete deletion of H1 was confirmed  
162 by western blots, compared to the partial depletion of H1 in *h1.1-1 h1.2-1*  
163 *h1.3-1* mutant (Supplemental Fig. S1F). The primary roots of *h1* seedlings are  
164 shorter than those of wild type (Col) (Fig. 1C), and enlarged nuclei in *h1* leaves  
165 were indicated by guard cell nuclei without endoreduplication (Supplemental  
166 Fig. S1G, H). At the subnuclear level, we observed that H1 is highly enriched in  
167 DAPI-dense heterochromatic chromocenters in wild type (Supplemental Fig.  
168 S2A), and depletion of H1 causes dramatic decondensation of chromocenters  
169 (Fig. 1D). We then compared the subnuclear distributions of H1.1, H1.2 and  
170 H1.3, and found that H1.2 co-localizes with H1.1 or H1.3 in nuclear foci by  
171 transiently co-expressing H1.1-YFP/H1.2-mCherry or H1.3-YFP/H1.2-mCherry  
172 (Supplemental Fig. S2B).

173 To evaluate the impact of H1 on transcription, we profiled the transcript  
174 levels in *h1* by RNA-seq. Among 1974 genes significantly regulated in *h1*,  
175 1268 are up-regulated and 706 down-regulated (Fig. 1E; Supplemental Fig.  
176 S3A; Supplemental Table S1). Gene ontology (GO) analysis revealed that  
177 these differentially expressed genes (DEGs) are involved in a variety of



178 response processes (Supplemental Fig. S3B; Supplemental Table S2),  
179 indicating the functions of H1 in responses to environmental and  
180 developmental cues. To verify the results of RNA-seq, we analyzed the  
181 transcript levels of several response-related genes by qRT-PCRs. The results  
182 were consistent with those in RNA-seq (Supplemental Fig. S3C; Supplemental  
183 Table S1). In addition, we found that the differentially up-regulated and  
184 down-regulated genes distribute in all five chromosomes (Fig. 1F).

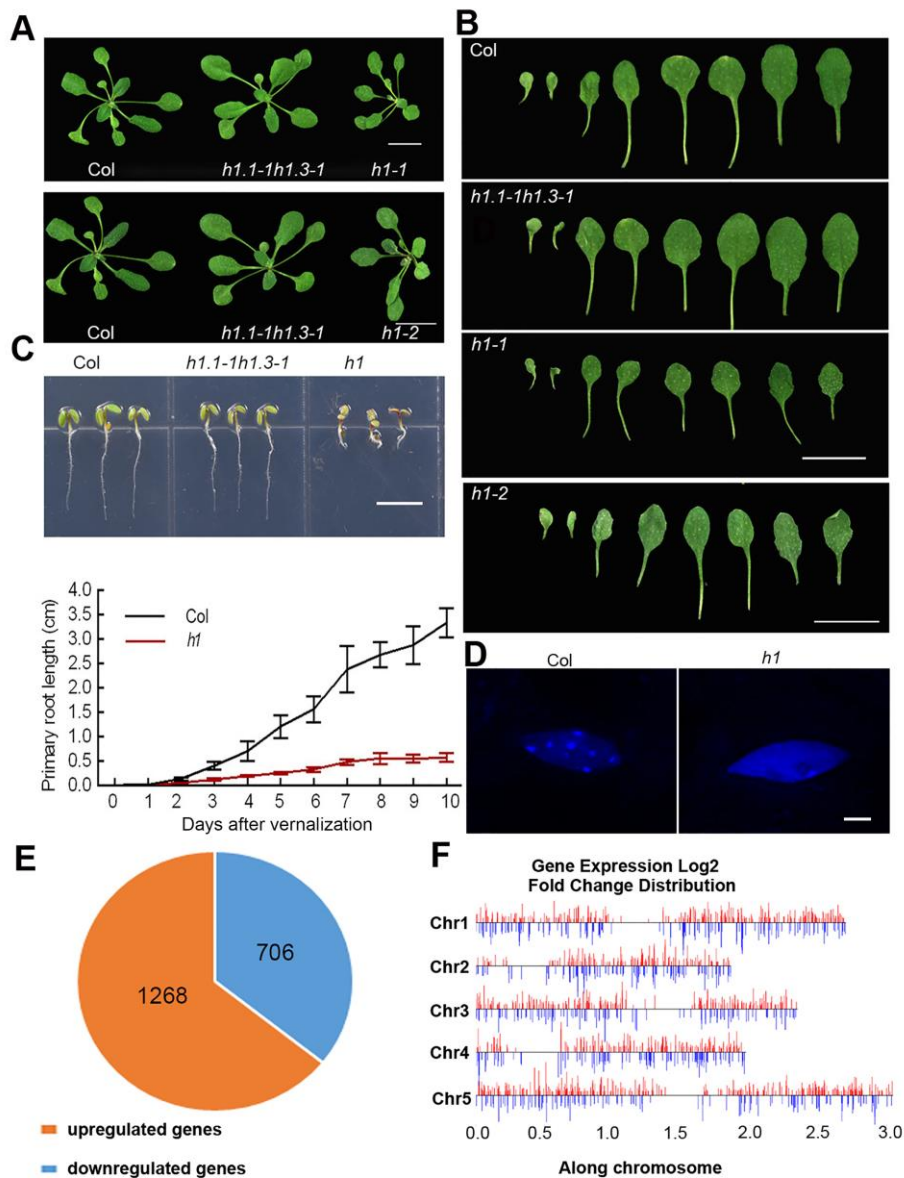

185

186 **Figure 1.** Visual phenotypes and gene expression of *Arabidopsis*  
187 seedlings upon H1 depletion. (A) Visual phenotypes of *h1-1* and *h1-2*  
188 compared to Col and *h1.1h1.3* plants. (Scale bar, 1 cm). (B) Rosette  
189 leaves of Col, *h1.1h1.3* and *h1* mutant plants. (Scale bar, 1 cm). (C)  
190 Phenotypes of Col, *h1.1h1.3* and *h1* seedlings grown 4 d after  
191 vernalization. (Scale bar, 1 cm), and statistics of primary root lengths of  
192 *h1* and Col plants. Error bars represent mean $\pm$ SDs (n=30). (D) Nuclei of  
193 *h1* and Col leaf epidermal cells shown by DAPI staining. (Scale bar: 4  
194  $\mu$ m.). (E) Numbers of up-regulated and down-regulated genes ( $|\log_2$ fold  
195 change| > 1) in *h1* mutant compared to Col. The data from three  
196 biological replicates were combined. (F) Distribution of DEGs in genome.  
197 The algorithm of DEseq2 and PossionDis were performed to detect the  
198 DEGs.

199

200

201 **H1 depletion causes the dampened inter- and intra-chromosomal**  
202 **interactions and extensive A/B compartment switches**

203 To dissect genome-wide chromatin architecture, we performed Hi-C  
204 experiments of *h1* mutant (Supplemental Table S3) and Col with each of them  
205 having a high reproducibility between two biological replicates (Supplemental  
206 Fig. S4A, B). The Hi-C data of Col were obtained from our previous report  
207 (Zhang et al. 2019), and used as the control because the seedlings of *h1* null  
208 mutant and Col were grown and sampled in parallel at the same time and  
209 conditions. Compared to the typical Hi-C heatmap of Col, a clearly

210 homogenous pattern of Hi-C heatmap was observed for *h1* mutant (Fig. 2A).  
211 To address the chromosome clustering traits, we calculated the interaction  
212 difference matrix from the reads with the same sequencing depth between Col  
213 and *h1*. The genome-wide chromatin interaction difference matrix between Col  
214 and *h1* revealed that *h1* knockout results in dampened inter- and  
215 intra-chromosomal interactions (Fig. 2A-C), decreased inter- or intra-arm  
216 interaction (Fig. 2D, E), and inter-pericentromeric or telemetric interaction  
217 frequencies (Fig. 2F, G).

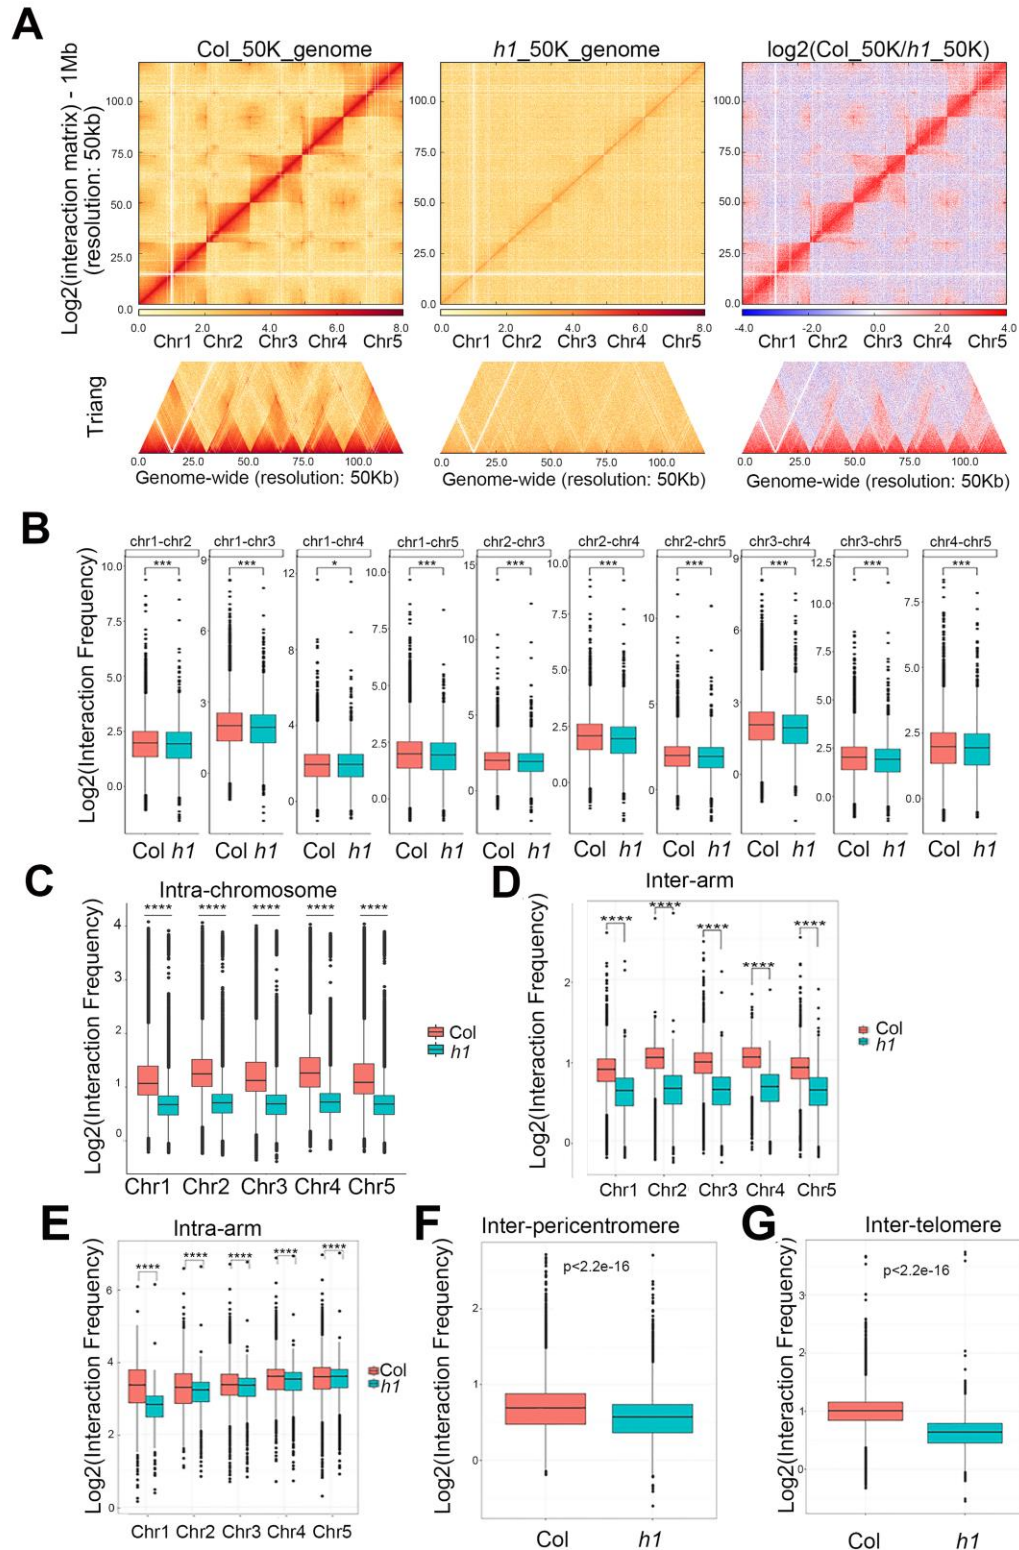

218

219 **Figure 2.** H1 depletion changes chromatin interactions. (A) Chromatin  
 220 interaction heatmaps of Col and *h1*, and differential chromatin interaction  
 221 heatmap between Col and *h1* at a 50 kb resolution. Chromosomes

222 stacked from bottom left to up right were chr1, chr2, chr3, chr4 and chr5.  
223 (B) Boxplots showing inter-chromosome interaction frequencies among  
224 all chromosome pairs between Col and *h1*. (C) Boxplots showing  
225 intra-chromosome interaction frequencies between Col (brick red) and  
226 *h1* mutant (blue). (D) Boxplots showing inter-arm interaction frequencies  
227 between Col (brick red) and *h1* mutant (blue). (E) Boxplots showing  
228 intra-arm interaction frequencies between Col (brick red) and *h1* mutant  
229 (blue). (F) Boxplots showing pericentromeric interaction frequencies  
230 between Col (brick red) and *h1* mutant (blue). (G) Boxplots showing  
231 telomeric interaction frequencies between Col (brick red) and *h1* mutant  
232 (blue). (\*\* $p < 0.001$ , \*\* $p < 0.01$ , \* $p < 0.05$ , NS  $p > 0.05$ . The  $p$  values were  
233 tested by Wilcoxon–Mann–Whitney test).

234

235 To quantitatively assess the chromatin contacts, we calculated interaction  
236 decay exponents (IDEs), which characterize chromatin packing as the slopes  
237 of a linear fit of average interaction intensities detected at a given range of  
238 genomic distance (Grob et al. 2014). The results displayed that IDEs of  
239 intra-chromosome arms (Supplemental Fig. S5A-F), pericentromeres  
240 (Supplemental Fig. S6A-F) and telomeres (Supplemental Fig. S7A-F) in *h1* are  
241 all lower than those in Col.

242 Next, we defined the active (A) and inactive (B) chromatin compartments  
243 in *h1* and Col by Pearson Correlation (PC1) values (Fransz et al. 2000; Grob et  
244 al. 2013). We compared the compartments A/B through the first principal

245 component at a 50 kb resolution between Col and *h1* mutant. We found that  
246 31.0% and 27.5% of the genome showed conserved compartment A and B,  
247 respectively (Fig. 3A-C). We observed that H1 depletion induces extensive  
248 switches between chromatin compartment A and B (Fig. 3A-C; Supplemental  
249 Fig. S8A-D; Supplemental Fig. S9A-D), with 18.5% converted from  
250 compartment A to B, and 22.9% converted from compartment B to A (Fig. 3C).  
251 In addition, we found that the compartment transition from A to B occurs more  
252 than B to A on chromosome 1 (Chr1), Chr2, Chr3 and Chr5, and B to A more  
253 than A to B only on Chr4 (Fig. 3D).

254

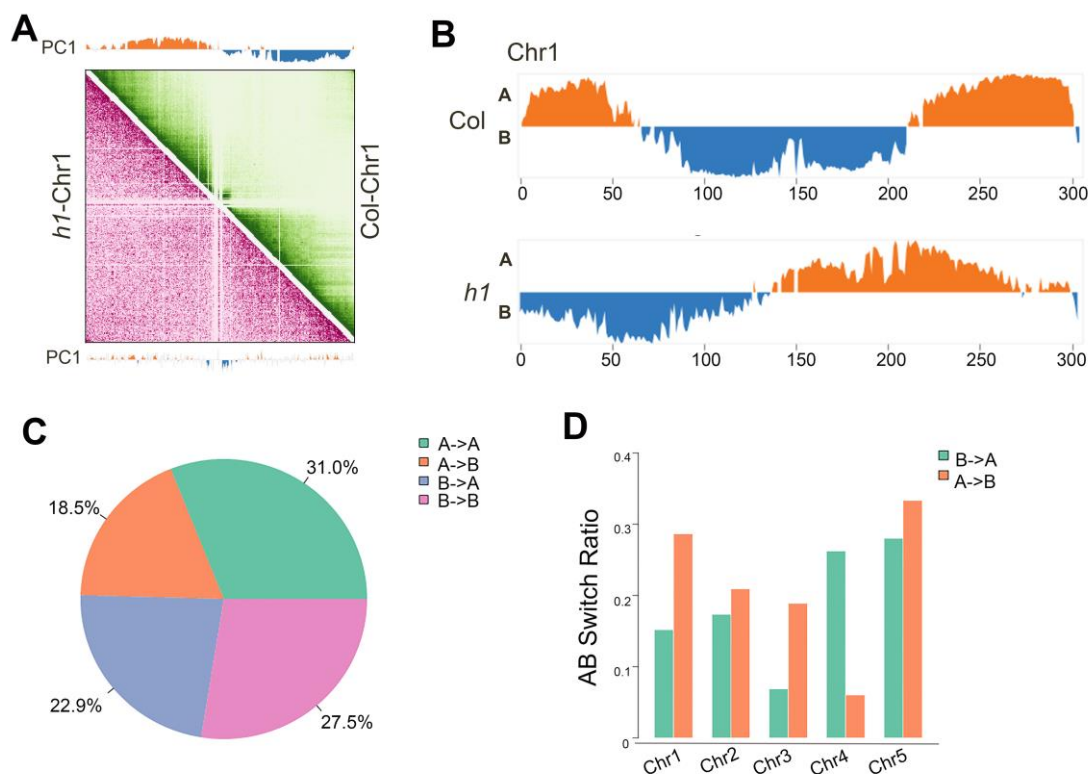

255

256 **Figure 3.** H1 depletion changes chromatin compartmentalization. (A)  
257 Pearson correlation coefficient matrix and its respective first eigenvector  
258 of chr1. The orange regions in the first eigenvector represent



259 compartment A, and the blue regions represent compartment B.  
260 Genomic bin size: 50 kb. (B) First eigenvector of chr1. Compartment A is  
261 presented in orange and compartment B in blue. (C) Pie chart  
262 representing the percentages of chromatin compartment switches  
263 between Col and *h1* mutant. (D) Bar graph showing the statistics of  
264 structure domain changes in all chromosomes between Col and *h1*  
265 mutant.

266

267 **The nucleosome density decreases in centromeric regions and**  
268 **increases in chromosome arms in *h1* mutant**

269 To study the potential relationship between the observed weakened chromatin  
270 interactions in *h1* and nucleosome density, we first examined micrococcal  
271 nuclease (MNase) accessibility which reflects the nucleosome occupancy and  
272 gene accessibility by digesting naked DNA through MNase (Li et al. 2014). The  
273 results showed that the chromatin in *h1* is more resistant to MNase digestion  
274 than Col (Fig. 4A), and all of the mononucleosome ratios were significantly  
275 decreased under different MNase levels (Fig. 4B). In addition, western blots  
276 indicated that the total H3 and H4 protein levels increase in *h1* compared to  
277 Col (Fig. 4C, D). These results indicated that the complete depletion of H1  
278 results in an elevated average density of nucleosomes in chromatin.

279

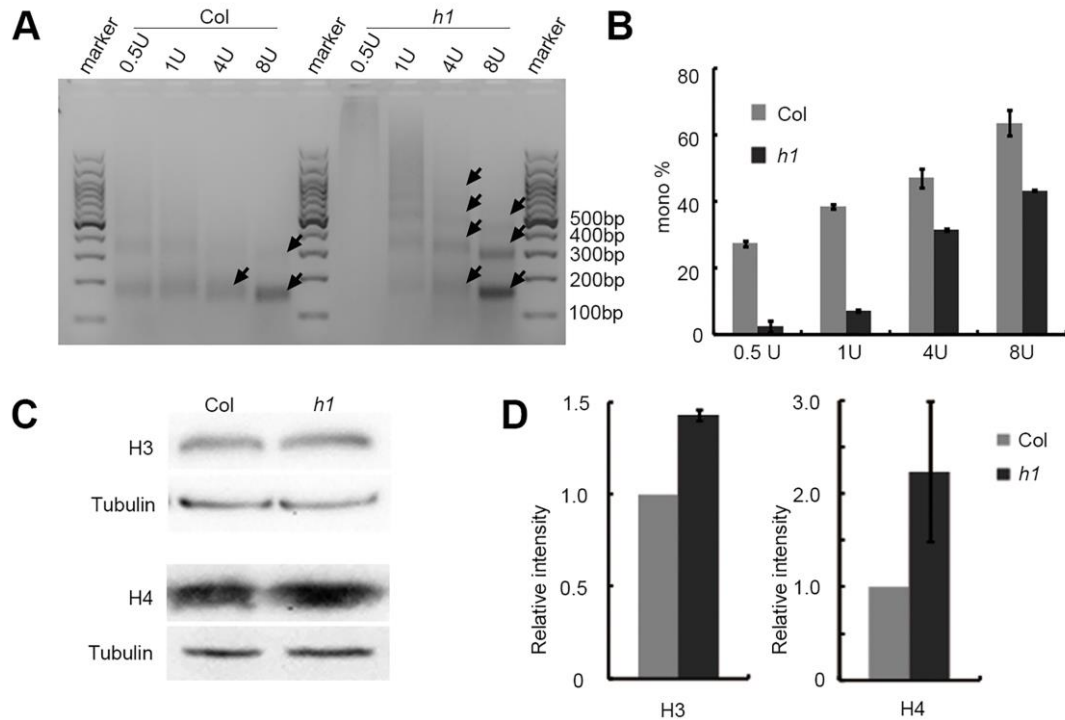

280

281 **Figure 4.** H1 affects the nucleosome density. (A) Different titration levels

282 of MNase in the reaction of nuclei extracted from *h1* and Col plants. *h1* is

283 more insensitive to MNase than Col. (B) Quantification of

284 mono-nucleosome in *h1* and Col seedlings from the three biological

285 replicates of MNase digestion reaction. The data was analyzed by

286 Gel-Pro analyzer, the mononucleosome ratios are defined as the gray

287 value of the nucleosome monomer band divided by the gray value of the

288 whole lane. (C) Western blot on total H3 and H4 in *h1* and Col plants.

289 One of three biological replicates with similar results is shown. (D)

290 Quantification of H3 and H4 protein abundance in *h1* and Col seedlings

291 from western blot analysis in three biological replicates.

292

293 To examine the chromosomal distribution of nucleosomes in *h1* null



294 mutant, we performed MNase accessibility assays followed by sequencing  
295 (MNase-seq) (Supplemental Table S4) in Col and *h1* mutant. The results  
296 showed that significant alteration of nucleosome density was presented along  
297 all the five chromosomes (Supplemental Fig. S10). To refine the changes of  
298 nucleosome packaging in different chromosome regions, we analyzed the  
299 nucleosome density on centromeres, pericentromeres and chromosome arms,  
300 respectively. We found that the nucleosome density dramatically decreases on  
301 centromeres, while increases in both right- and left-chromosome arms. In  
302 contrast, nucleosome density in the right- and left-pericentromeres showed no  
303 obvious change (Supplemental Fig. S11A-E).

304 We then analyzed the nucleosome distribution in different types of genes,  
305 and found that the overall patterns of nucleosome distribution in protein-coding  
306 genes (PCGs), pseudogenes and transposable elements (TEs) in *h1* mutant  
307 were similar to those in Col. The evenly spaced nucleosome distribution is  
308 observed in gene bodies of PCGs, but not in promoters of PCGs  
309 (Supplemental Fig. S12A-C). However, compared to Col, PCGs display a  
310 higher nucleosome density in their promoter regions (Supplemental Fig. S12A);  
311 pseudogenes and TEs show a slight decrease of nucleosome density  
312 (Supplemental Fig. S12B, C).

313 We further analyzed the nucleosome distribution in up-regulated,  
314 down-regulated and unregulated genes in *h1* mutant. We observed that the  
315 evenly spaced nucleosome distribution is absent in the bodies of DEGs, but

316 kept in the bodies of non-DEGs upon H1 depletion (Supplemental Fig.  
317 S12D-F). In addition, the nucleosome density in *h1* mutant is elevated in  
318 promoters, but not in gene bodies, irrelevant of DEGs or non-DEGs  
319 (Supplemental Fig. S12G, H).

320

321 **The levels of CHG and CHH DNA methylations increase in centromeric**  
322 **regions and decrease in chromosome arms in *h1* mutant**

323 Loss of H1 was reported to cause the elevation of total genomic DNA  
324 methylation (Rea et al. 2005). Given that the nucleosome density shows  
325 variation among different chromosomal regions, we investigated the potential  
326 variations of DNA methylation along chromosomes upon complete depletion of  
327 H1. Compared to Col, we found that the DNA methylation level (Supplemental  
328 Table S5) in *h1* null mutant increases most obviously over centromeric regions  
329 (Supplemental Fig. S13). In addition, DNA methylation levels in CG, CHG and  
330 CHH sequence contexts show different distribution patterns along  
331 chromosomes (Supplemental Fig. S13B), with the hypermethylation and  
332 hypomethylation of CG more evenly distributed in the genome. In contrast, the  
333 hypermethylation sites of CHG and CHH locate mainly around centromeres,  
334 while the hypomethylation sites of CHG and CHH distribute on chromosome  
335 arms with the hypomethylation sites of CHH enriched in the chromosome  
336 regions adjacent to centromeres (Supplemental Fig. S13C). Compared to that  
337 the nucleosome density decreases in centromeric regions and increases in

338 chromosome arms in *h1* mutant, the reverse correlation between DNA  
339 methylation and nucleosome density in centromeric regions and chromosome  
340 arms was thus indicated.

341 Next, we analyzed the effect of H1 on DNA methylation in various DNA  
342 elements, and found that the DNA methylation level of repeat sequences  
343 increased significantly in *h1* (Supplemental Fig. S14A). In addition, we found  
344 that hypermethylation and hypomethylation of gene bodies have higher ratios  
345 for longer genes, and hypermethylation of TEs have a higher ratio for longer  
346 TEs, while hypomethylation of TEs is not related to their sizes upon *h1*  
347 mutation (Supplemental Fig. S14B).

348 To examine potential genes that might regulate DNA methylation in *h1*  
349 mutant, we analyzed the transcription levels of DNA methyltransferases (*MET1*,  
350 *DRM2*, *DRM3*, *CMT2* and *CMT3*), DNA demethylase (*DME*, *ROS1*, *DML2* and  
351 *DML3*), histone methyltransferases (*SUVH4*, *SUVH5* and *SUVH6*), histone  
352 demethylase (*IBM1*) and the chromatin remodeling factor (*DDM1*) involved in  
353 DNA methylation directly or indirectly in RNA-seq data. We found that the  
354 transcription levels of these DNA methylation-related genes do not change  
355 obviously in the absence of histone H1 (Supplemental Fig. S15), implying that  
356 the change of DNA methylation might not result from the altered levels of DNA  
357 methylation-related genes in *h1* mutant.

358

359 **DNA methylation is uncoupled from the transcriptional regulation in *h1***

360 **mutant**

361 We then analyzed the relationship between transcription and DNA methylation  
362 which generally serves as a repressive marker of transcription (Zemach et al.  
363 2010). To this end, we first analyzed the normalized RNA-seq FPKM of all  
364 differential hyper- and hypo- methylated genes, and found that there are no  
365 obvious differences (Fig. 5A). We then analyzed the normalized RNA-seq  
366 FPKM of DEGs intersected with hyper- or hypo-methylation genes. We found  
367 that FPKMs of both hyper- and hypo- DNA methylation genes in *h1* were  
368 higher than those in Col (Fig. 5B), in contrast to expectation that the FPKM of  
369 hyper-methylation genes decreases and FPKM of hypo-methylation genes  
370 increases.

371 We found that only a small portion of DEGs (233/1974, about 11.29%)  
372 localizes in the differential DNA methylation regions (Fig. 5C). Among these  
373 233 genes, 81 genes are RNA-up-regulated and DNA  
374 methylation-down-regulated, and 32 genes are RNA-down-regulated and DNA  
375 methylation-up-regulated as indicated in Venn diagram which includes  
376 RNA-seq data of 1974 DEGs and WGBS data of 4139 differentially methylated  
377 genes (Fig. 5C; Supplemental Table S6). Given that DNA methylation can also  
378 serve as an active marker in some circumstances (Harris et al. 2018), we then  
379 clarified the overall relationship between transcription and DNA methylation by  
380 bootstrapping randomized analysis by randomly selecting 5000 group of equal  
381 number (1974) of non-regulated genes to determine the percentage of those

382 genes overlapped with DNA methylation-related genes. The result showed that  
383 the percentage of DEGs localized in the percentage of randomly selected  
384 genes (Fig. 5D), indicating that DNA methylation is no longer a regulatory  
385 factor of gene transcription upon H1 depletion.  
386

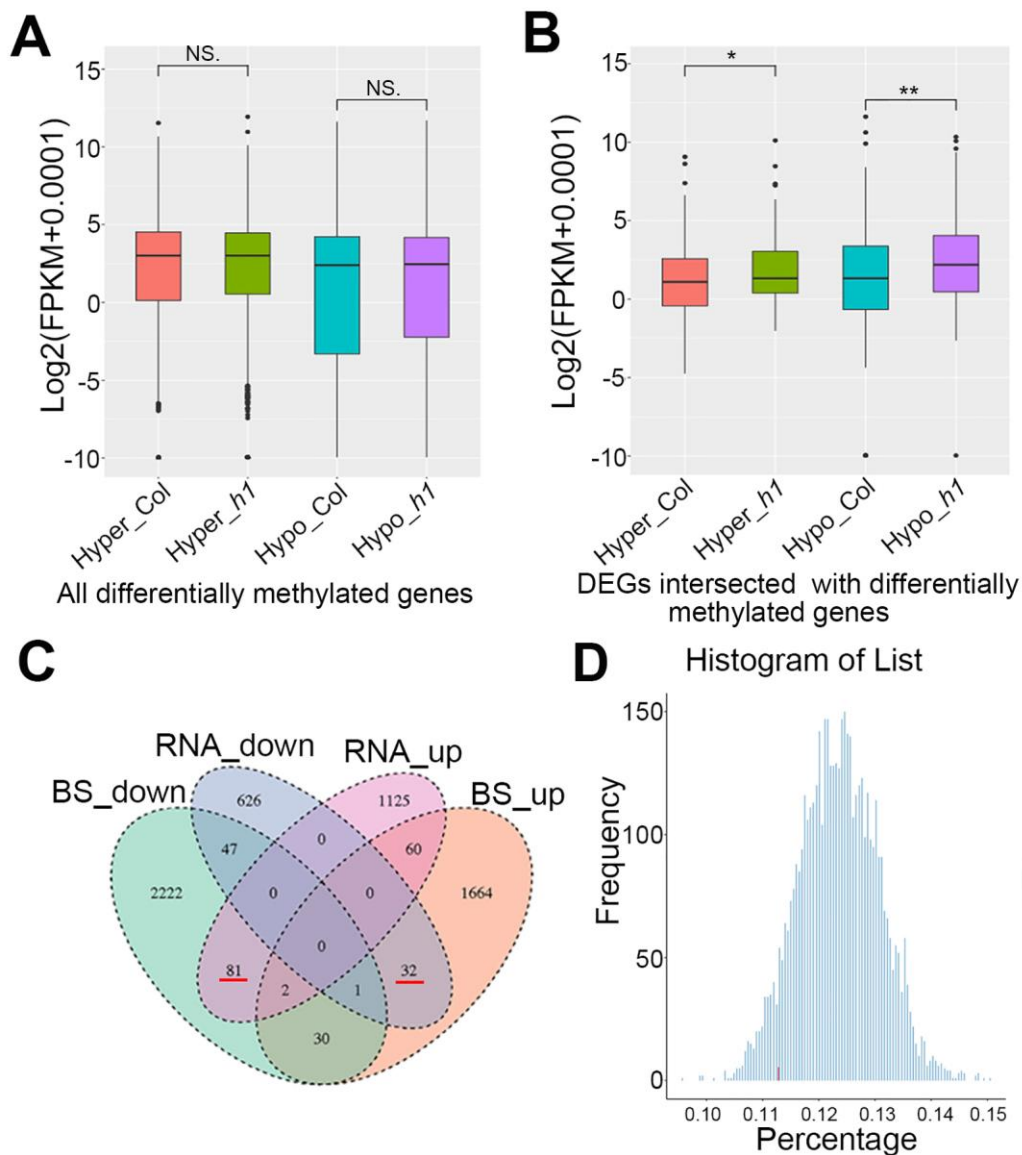

387

388 **Figure 5.** The relationship between DNA methylation and transcription

389 upon H1 depletion. (A) Boxplot showing the normalized RNA-seq FPKM

390 of all differentially methylated genes. (B) Boxplot showing the normalized

391 RNA-seq FPKM of intersected differentially methylated genes and  
392 expressed genes. (\*\* $p < 0.001$ , \*\* $p < 0.01$ , \* $p < 0.05$ , NS  $p > 0.05$ . The  $p$   
393 values were tested by Wilcoxon–Mann–Whitney test). (C) Venn  
394 diagrams showing numbers of genes WGBS-down (green), RNA-down  
395 (blue), RNA-up (pink) and WGBS-up (brick red) in Col and *h1* mutant. (D)  
396 Histogram of randomly selected no-regulated genes (1974) in differential  
397 methylation bins (group number = 5000). The red bar shows the  
398 percentage of DEGs in DNA methylation-related genes, and the blue bar  
399 chart shows the percentage of equal number (1974) of non-regulated  
400 genes in DNA methylation-related genes.

401

402 **DNA methylation is uncoupled from the chromatin compartmentalization**  
403 **in *h1* mutant**

404 DNA methylation was known to correlate with chromatin compartmentalization,  
405 and used to reconstruct compartments A/B in Hi-C analysis (Fortin and  
406 Hansen 2015). To gain insight into the correlation between DNA methylation  
407 and chromatin structure, we analyzed DNA methylation in the chromatin  
408 regions with converted compartments. We found that only 20% differentially  
409 methylated genes (830/4139, about 20%) overlapped with chromatin  
410 compartment A/B conversions (Fig. 6A). In addition, we found the Cs, CG,  
411 CHG, and CHH methylation levels of both A to B and B to A chromatin  
412 compartment transition-related genes in *h1* are lower than those in Col

413 (Supplemental Fig. S16A-D), in contrast to the general expectation that the  
414 methylation level in A to B regions increases, while that in B to A regions  
415 decreases.

416 We then analyzed the DNA methylation levels of genes intersected  
417 between DNA methylation and A/B switches, and found that the Cs, CG, CHG,  
418 and CHH methylation levels of both compartments A to B or B to A  
419 switch-related genes in *h1* are lower than those in Col (Fig. 6B-E). We further  
420 analyzed the promoter regions and TSSs of genes intersected between DNA  
421 methylation and compartment A/B switches (Supplemental Table S7). The  
422 results indicated that the Cs, CG, CHG, and CHH methylation levels of both  
423 compartments A to B or B to A switch-related genes in *h1* are lower than those  
424 in Col (Supplemental Fig. S16E-L). Together, we concluded that there is no  
425 correlation between DNA methylation and chromatin compartment A/B  
426 conversions in *h1* mutant.

427

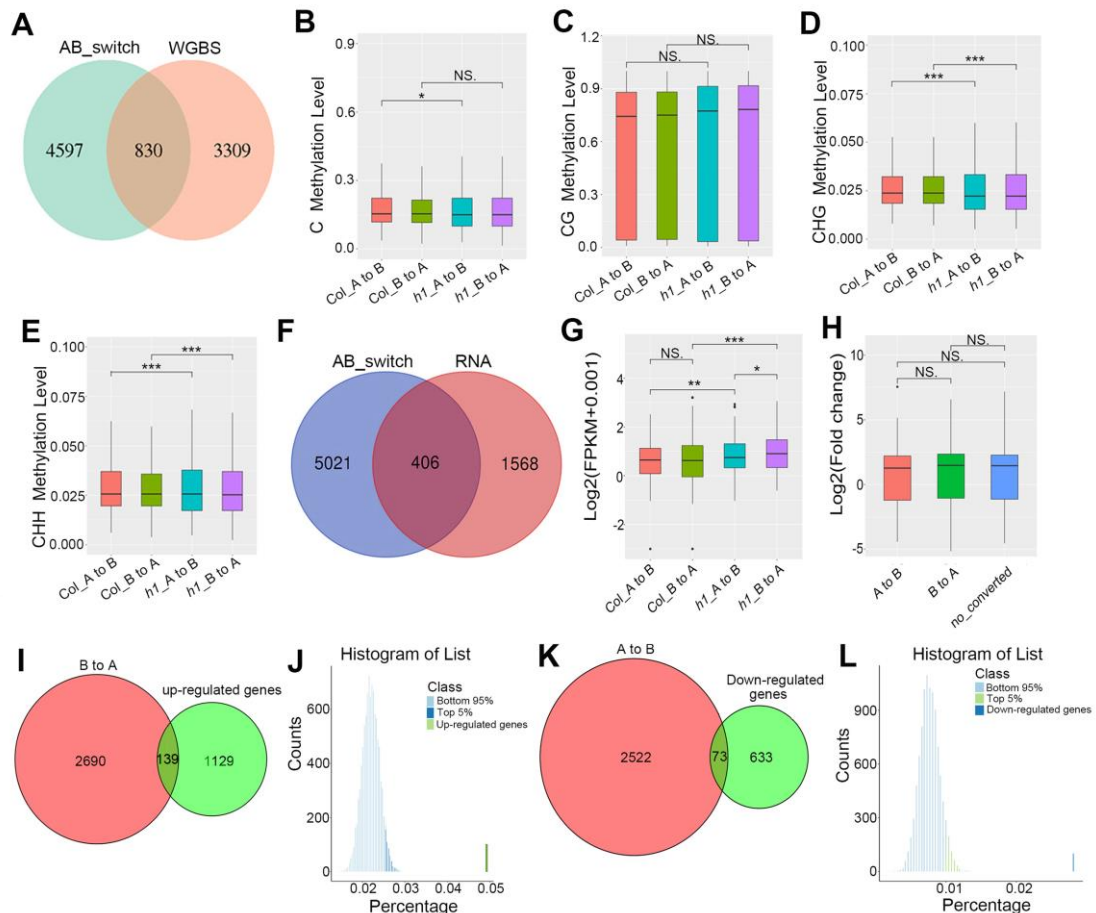

428

429 **Figure 6.** The relationships between chromatin compartments A/B

430 switches and transcription or DNA methylation in *h1* mutant. (A) Venn

431 diagram showing number of A/B switched genes (blue) and WGBS

432 differential genes (pink) in *h1* compared to Col. (B-E) Boxplot showing all

433 Cs (B), CG (C), CHG (D), or CHH (E) types of methylation levels in

434 intersected genes between compartment A/B switches and DNA

435 methylation, respectively. (F) Venn diagrams showing numbers of genes

436 in switched regions between compartment A/B (dark blue) and DEGs

437 (pink) in Col and *h1* mutant. (G) Boxplot showing the transcription levels

438 in Col and *h1* in the switched chromatin regions between compartment A



439 and B. (H) Boxplot showing log<sub>2</sub> fold change of expression levels of  
440 genes in regions with switched chromatin domain between compartment  
441 A and B or without compartment transition (no converted). (I) Venn  
442 diagrams showing numbers of genes in compartment B to A (pink) and  
443 up-regulated genes (green) in *h1* mutant compared to Col. (J) Histogram  
444 of randomly selected no-regulated genes (139) in differential interaction  
445 bins (group number = 5000). The top 5 percentile of randomly selected  
446 control genes was labeled in blue. (K) Venn diagrams showing numbers  
447 of genes in compartment A to B (pink) and down-regulated genes (green)  
448 in *h1* mutant compared to Col. (L) Histogram of randomly selected  
449 down-regulated genes (73) in differential interaction bins (group number  
450 = 5000). The top 5 percentile of randomly selected control genes was  
451 labeled in green. (\*\**p* < 0.001, \*\**p* < 0.01, \**p* < 0.05, NS *p* > 0.05. The *p*  
452 values were tested by Wilcoxon–Mann–Whitney test).

453

#### 454 **The switches of compartment A/B are largely uncorrelated with gene** 455 **transcription**

456 To reveal the role of chromatin folding in regulating gene expression upon H1  
457 depletion, we analyzed the correlation between chromatin compartment  
458 switches and transcription. We found that most of DEGs (1568/1974, about  
459 79.4%) show no overlap with chromatin compartment switches between A and  
460 B (Fig. 6F) with only a small portion of DEGs (406/1974, about 20.6%)

461 overlapped with chromatin compartment A/B switches (Fig. 6F). In addition,  
462 although chromatin compartment switches account for 41.4% (18.5%+22.9%,  
463 Fig. 3C) of the *Arabidopsis* genome, only 7.7% (1974/25498) (*Arabidopsis*  
464 Genome Initiative 2000) of genes are DEGs in *h1* mutant, supporting that most  
465 of the A/B switches do not affect transcription.

466 To further evaluate the relevance between A/B switches and transcription,  
467 we analyzed the normalized RNA-seq FPKM of genes in compartment A/B  
468 switches, and found that genes in compartments transited from B to A show  
469 only slightly higher expression levels than those in compartments transited  
470 from A to B in *h1* mutant (Fig. 6G). We also noticed that most of DEGs (1568  
471 genes) show no overlap with A/B switches (Fig. 6H). We further found that only  
472 10.9 % (139/1268) up-regulated genes localized in compartment B to A  
473 switches (Fig. 6I), and 10.3% (73/706) down-regulated genes localized in  
474 compartments A to B switches (Fig. 6K). To know the confidence of these  
475 results, we performed bootstrapping randomized analysis. We randomly  
476 selected 5000 group of equal number (139) of up-regulated genes to  
477 determine the percentage of those genes overlapped with compartment A/B  
478 switches-related genes. The results showed that the top 5 percentile of  
479 randomly selected genes (2.6%) are only slightly lower than the percentage of  
480 up-regulated genes localized in compartment B to A switches (139/2690 $\approx$   
481 5.2%) (Fig. 6J). In addition, we randomly selected 5000 group of equal  
482 number (73) of down-regulated genes to determine the percentage of those

483 genes overlapped with compartment A/B switches-related genes, and found  
484 that the top 5 percentile of randomly selected genes (1.2%) are only slightly  
485 lower than the percentage of up-regulated genes localized in compartments A  
486 to B switches ( $73/25220 \approx 2.9\%$ ) (Fig. 6L). We concluded that chromatin  
487 compartment switches are predominantly not related to the gene regulation in  
488 *h1* knockout mutant.

489

## 490 **Discussion**

491 The linker histone H1 binds and locks the adjacent nucleosomes to maintain  
492 chromatin structure (Fan et al. 2005). In the study, we found that unlocking in  
493 and out ends of nucleosome DNA by H1 complete depletion dampens the  
494 chromatin interactions, alters nucleosome density and distribution, changes  
495 the level and distribution of DNA methylation and affects the expressions of a  
496 subset of genes. Notably, loss of H1 disrupts the connections among  
497 chromatin interactions, DNA methylation and transcription, in which the H1  
498 depletion-induced changes of nucleosome density and distribution might play  
499 an important role.

500

## 501 **The role of linker histone H1 in regulating plant growth and development**

502 *Arabidopsis*, which harbors only three genes encoding linker histone H1, is  
503 a good model organism to study the functions of H1. The partial mutants were  
504 reported, such as RNAi triple knockdown mutant (Wierzbicki and

505 Jerzmanowski 2005), or T-DNA insertion triple knockdown mutant *h1.1-1*  
506 *h1.2-1 h1.3-1* with subtle phenotypes at developmental transitions (Rea et al.  
507 2012; Rutowicz et al. 2019). In this study, we generated knockout mutants of  
508 histone *H1s* by T-DNA insertions and CRISPR/Cas9-based gene editing,  
509 which show pleiotropic phenotypes and are fertile. RNAi lines of H1 showed  
510 pleiotropic developmental abnormalities including changed size, serrated,  
511 small or elongated leaves, and reduced apical dominance, and plants with  
512 aberrant phenotypes have a considerably greater reduction of H1 expression  
513 than plants with no visible changes (Wierzbicki and Jerzmanowski 2005). We  
514 observed the *h1* null mutant phenotypes of small plant size, short primary roots,  
515 serrated, small and elongated leaves, indicating the roles of H1 in plant growth  
516 and development by regulating a subset of genes.

517 There are 11 H1-coding genes in human and mouse, including replication  
518 dependent *H1.1-H1.5*, non-replication dependent *H1.0* and *H1.X*, sperm  
519 specific *H1t*, *H1T2* and *H1LS1*, and egg specific *H1oo* (Godde and Ura 2009;  
520 Kowalski and Palyga 2012). Knockouts of *H1.3*, *H1.4* and *H1.5* in mouse  
521 resulted in the death of embryos with altered distribution of nucleosomes and  
522 without change of the nuclear size (Fan et al. 2003). However, *Tetrahymena*  
523 strains that lacked either macronuclear or micronuclear histone H1 proteins or  
524 both were fully viable, showing similar growth to the wild type strains,  
525 implicating that H1 is more important for higher organisms. The increasing  
526 number of *H1* genes during the evolution of higher organisms might be due to

527 the needs for precise and specific regulation of gene expressions or responses  
528 to environmental stimuli as the tissue-specific expression of H1 was observed  
529 in mammalian and the expressions of response genes were induced by H1  
530 depletion as shown in this study. H1 can also affect the phenotypes of  
531 organisms by modulating the post-translational modifications of histones  
532 (Ausio 1992; Herrera et al. 2000).

533

534 **The role of H1 in functional connections among chromatin interactions,**  
535 **DNA methylation and transcription**

536 At the cellular level, H1 depletion results in the increased nuclear size and  
537 decondensation of heterochromatic chromocenters. Hi-C analysis showed that  
538 the complete depletion of H1 in *Arabidopsis* dampens the chromatin  
539 interactions, supporting the role of linker H1 in the high-order chromatin  
540 structure in addition to its role in facilitating the folding of chromatin into 30 nm  
541 fiber. Moreover, significant alterations of nucleosome density and distribution  
542 were induced along all chromosomes. The nucleosome repeat length of  
543 H1-rich genes was observed to decrease substantially in *Arabidopsis h1*  
544 knockdown mutants (Choi et al. 2020). The increase of nucleosome density  
545 and decrease of nucleosome repeat length might prevent chromatin DNA from  
546 getting closer to each other, leading to increased nuclear size and decreased  
547 chromatin interactions which might affect the nucleating of heterochromatin in  
548 chromocenters.

549 Further, we found the extensive switches between chromatin  
550 compartment A and B upon H1 depletion, indicating the important function of  
551 H1 in defining the chromatin domain identity. A/B compartments were known  
552 to be related to DNA methylation (Fortin and Hansen 2015). However, our  
553 results showed that both the changes of DNA methylation and expressions of  
554 most DEGs are uncorrelated with the chromatin compartment switches in *h1*  
555 mutant, indicating that the linker histone also serve as a linker between  
556 chromatin compartment identity and DNA methylation directly or indirectly. Our  
557 results from the *Arabidopsis* H1 knockout line are different from those in  
558 mammalian or human H1 knockdown cells. In embryonic stem cells with about  
559 50 % depletion of H1, the 3D genome showed no significant change and the  
560 alterations in TAD configuration coincide with epigenetic landscape changes  
561 but not with transcriptional output changes (Geeven et al. 2015). In addition,  
562 most A/B genomic compartments and TADs are unchanged upon deletion of  
563 H1C, H1D and H1E in mammals (Willcockson et al. 2020). In *h1c/h1d/h1e*  
564 triple and *h1c/h1e* double mutants, the chromatin architectural and epigenetic  
565 changes underlie the transcriptional alterations (Willcockson et al. 2020;  
566 Yusufova et al. 2020). How H1 maintains the relationship between the 3D  
567 structure of chromatin and DNA methylation is worthy of further study.

568 Interestingly, the compartment switches from A to B are more than B to A  
569 on chromosome 1 (Chr1), Chr2, Chr3 and Chr5, while B to A are more than A  
570 to B only on Chr4 (Fig. 3D), which might be related to the specific chromatin

571 status of Chr4 with nucleolar associated chromatin domain (NAD) and  
572 nucleolar organizer region 4 (NOR4) (Pontvianne et al. 2016; Rabanal et al.  
573 2017).

574

### 575 **The correlation between the nucleosome density and DNA methylation**

576 In eukaryotes, DNA methylation plays important roles in chromatin structure  
577 (Zhang et al. 2017). In ascomycete fungi, loss of H1 leads to genome-wide  
578 hypermethylation (Barra et al. 2000; Seymour et al. 2016). In mouse, the  
579 mutation of H1 reduces the DNA methylation levels in specific loci (Yang et al.  
580 2013). In *Arabidopsis*, knockdown of H1 increases DNA methylation levels of  
581 heterochromatic elements and decreases DNA methylation levels of  
582 euchromatic TEs in all sequence contexts (Choi et al. 2020; Rutowicz et al.  
583 2015; Zemach et al. 2013). In animals, CpG methylation induces tight  
584 wrapping of DNA around the histone core accompanied by a topologic change,  
585 and the changes in physical properties of nucleosomes induced by CpG  
586 methylation may contribute to the formation of repressive chromatin  
587 architectures (Lee and Lee 2012). The non-CG methylations (CHG and CHH)  
588 in plant are mainly distributed in heterochromatin region (Du et al. 2015). Our  
589 results revealed that the levels of CHG and CHH DNA methylations increase in  
590 centromeric regions and decrease in chromosome arms, while the  
591 nucleosome density dramatically decreases in centromeres and increases in  
592 chromosome arms in *h1* mutant. One possible reason might be that the more

593 nucleosome facilitates stronger chromatin condensation, which prevents DNA  
594 methyltransferases or DNA demethylases to access to target sites as the  
595 transcription levels of these DNA methyltransferase or demethylase genes do  
596 not change obviously. The study of DDM1 supported this idea, showing DDM1  
597 remove H1 from chromatin in order to facilitate the access of DNA methylation  
598 factors (Lyons and Zilberman 2017). Other studies also pointed out that  
599 nucleosomes are substantial obstacles to DNA methylation (Baubec et al.  
600 2015; Huff and Zilberman 2014). However, the precise mechanism of H1  
601 involved in DNA methylation needs to be intensely investigated, and the  
602 functions of HMGA proteins, which compete with histone H1 to bind to linker  
603 DNA (Catez and Hock 2010; Charbonnel et al. 2014) , also need to be  
604 examined upon H1 complete depletion.

605

### 606 **The role of H1-defined nucleosome distribution in the gene expression**

607 Only a subset of genes are specifically regulated upon depletion of H1,  
608 however, the underlying mechanism about the specific gene regulation  
609 through H1 is not clear. Upon unlocking in and out ends of nucleosome DNA  
610 by H1 complete depletion, the nucleosome density in promoters elevates, but  
611 not in gene bodies (Supplemental Fig. S12G, H), and the phased distribution  
612 pattern of nucleosome in gene bodies of regulated genes is lost, but not in  
613 gene bodies of unregulated genes (Fig. 5D, F), indicating the role of the  
614 specific nucleosome deposition defined by H1 in the regulation of gene



615 expression. Alternatively, transcription may also affect the differential  
616 nucleosome distribution between promoter and gene bodies. It was reported  
617 that H1 inhibits RNA polymerases from binding to chromatin (Krishnakumar et  
618 al. 1995), and regulates neuronal activation through modulating immediate  
619 early gene (IEG) expression, in which H1 is replaced by PARP on IEG  
620 promoters after neuronal stimulation (Azad et al. 2018). Therefore, H1 may  
621 also modulate the specific nucleosome density to regulate accessibility of  
622 transcription machinery to chromatin and affect gene expression.

623 This study unveiled for the first time the effect of H1 on the relationships  
624 among the 3D chromatin structure, DNA methylation and gene expression. In  
625 animal cells, no obvious change in the three-dimensional chromatin structure  
626 was observed upon partial depletion of linker histones (Geeven et al. 2015;  
627 Willcockson et al. 2020; Yusufova et al. 2020). In *Arabidopsis*, we observed  
628 enlarged nuclei and obvious decondensation of heterochromatic  
629 chromocenters, which correlates with a more homogenous pattern of  
630 chromatin interaction heatmap and dramatic changes of chromatin  
631 compartments upon H1 complete depletion. Our results shed light on the roles  
632 of linker histones in the maintenance of proper genome folding and  
633 coordinating chromatin compartmentalization, DNA methylation and gene  
634 expression.

635

636

## 637 **Methods**

### 638 **Plant materials and growth conditions**

639 Wild type *Arabidopsis thaliana* (Col-0 ecotype) and mutant plants were grown  
640 under 16 h light/8 h dark at 22 °C . T-DNA insertion lines of *h1.1-1*  
641 (SALK\_128430C), *h1.2-1* (SALK\_002142) and *h1.3-1* (SALK\_025209) were  
642 obtained from *Arabidopsis* Biological Resource Center and confirmed by  
643 PCR-based genotyping. Primers used were listed in Supplemental Table S8.

644 The knockout mutants of *h1-1* and *h1-2* through CRISPR/Cas9 -mediated  
645 editing were generated as previously reported (Feng et al. 2013; Yan et al.  
646 2015). The sgRNAs were listed in Supplemental Table S8.

647

### 648 **Constructs and transient expression**

649 The cDNAs of *H1.1*, *H1.2*, and *H1.3* were amplified by PCR from Col cDNAs  
650 using primers listed in Supplemental Table S8, digested by *EcoRI/SaII*, and  
651 subcloned into *EcoRI/SaII*-treated vectors of pCambia1300-35S-N1-YFP and  
652 pCambia1300-35S-N1-mCherry (Fang and Spector 2007). The constructs  
653 were confirmed by sequencing and introduced into *Agrobacterium*  
654 *tumefaciens* (GV3101) by electroporation.

655 *Arabidopsis* plants were transformed by the floral dip method (Clough and  
656 Bent 1998). Transient expression and colocalization analysis were performed  
657 as described (Fang and Spector 2010).

658

659 **Western blot**

660 Total proteins were extracted from 10-day-old seedlings. 100 mg materials  
661 were collected and ground in liquid nitrogen. The powders were suspended in  
662 3xSDS buffer (sample: buffer 1:3), then boiled at 100 °C for 10 min and  
663 centrifuged for 2 min at 12,000 rpm, the supernatants were separated on 15 %  
664 SDS-PAGE. Antibodies to H3 (Sigma H9289; 1:3000), H4 (Active Motif 61300;  
665 1:3000), and H1 (Agrisera AS111801; 1:3000) were used.

666

667 **DAPI staining**

668 Leaves from 4-week-old plants were used. After washes in PBS, nuclei were  
669 counterstained in Fluoromount mounting media with DAPI (4',  
670 6-diamidino-2-phenylindole, YEASEN 36308ES11). Images of nuclei were  
671 acquired as described (Shi et al. 2011) .

672

673 **Hi-C library preparation**

674 Hi-C experiments were performed essentially as described (Grob et al. 2014)  
675 with some modifications. Two biological replicates of Col we reported  
676 previously (Zhang et al. 2019) (GSE114950) and two biological replicates of *h1*  
677 null mutant were sampled in parallel with Col under same growth condition.  
678 Briefly, 2.5 g aerial parts of the seedlings were fixed and ground into powder in  
679 liquid nitrogen. 600 U *HindIII* restriction enzyme were used to digest the  
680 extracted nuclei by incubating overnight at 37 °C, then the digested chromatin

681 was blunt-ended with 1µl 10mM dATP, dTTP, dGTP and 25µl 0.4mM  
682 biotin-14-dCTP and 100 U Klenow fragment for 45 min at 37°C. The ligation  
683 reaction was performed in 10 time volume of ligation buffer under constant  
684 shaking with 745µl 10× ligation buffer, 10% Triton X-100, 80µl 10 mg/ml BSA  
685 and ATP, 100 Weiss U T4 DNA ligase, at 16°C for 6 h. The nuclei were then  
686 reverse-crosslinked with proteinase K at 65°C overnight. Subsequently, the  
687 extracted chromatin was fragmented into a mean size of 300 bp using a  
688 sonicator (Covaris S220). Hi-C libraries were constructed with NEB Next  
689 Multiplex Oligos kit and KAPA Hyper Prep Kit. The final library was subject to  
690 sequencing on an Illumina HiSeq 2000 instrument with 2 × 150-bp reads.

691

### 692 **Hi-C sequencing data processing**

693 Hic-pro (Servant et al. 2015) and Bowtie2 (Langmead and Salzberg 2012)  
694 were used for Hi-C read mapping. The clean Hi-C reads of Col and *h1* mutant  
695 were aligned to *Arabidopsis* reference genome (TAIR10) after removing the  
696 adapter. Following with HiC-Pro and Juicer software (Durand et al. 2016), valid  
697 pairs of Col and *h1* mutant were used to create interaction matrixes with bin  
698 size 50 kb for further analysis. The interaction matrixes were normalized with  
699 KR method from Juicer (Durand et al. 2016). The reproducibility of two  
700 biological replicates was tested with Pearson correlation coefficient from the  
701 interaction matrixes (Lin et al. 2018). After excluding the pericentromeres as  
702 reported (Grob et al. 2014), the first principal component was used to identify

703 compartments A and B with Juicer.

704

### 705 **Calculation of chromatin interaction and interaction decay exponents**

706 The normalized interaction matrix from Col was divided by the normalized  
707 interaction matrix from *h1* mutant, with all the zeros in matrixes replaced with  
708 1% quintiles from the non-zero elements in each matrix, which were used to  
709 analyze the difference of interaction matrixes between Col and *h1* mutant. We  
710 used Log2 transformation and median normalization to standardize the  
711 difference matrix. Interaction decay exponents (IDEs) were calculated (Grob et  
712 al. 2014) for chromosomes, pericentromeres and telomeres to study the  
713 interaction frequency changes dependent on the genome distance.

714

### 715 **Bootstrapping analysis**

716 In the bootstrapping strategies (Zhang et al. 2019; Buonaccorsi et al. 2018),  
717 we randomly selected 5000 groups ( $n = 5000$  times) of the relevant genes of  
718 equal number, which were subjected to the same analysis to determine the  
719 percentage of those groups fallen in differential interaction bins or differential  
720 methylation bins. The percentile of the test sample lie above the top 5  
721 percentile of the control distribution was considered confidently.

722

### 723 **Micrococcal nuclease treatment assay**

724 MNase assay was performed using protocol described (Zhang et al. 2018) with

725 slight modification. For each MNase assay, 2 g of 10-day-old seedlings were  
726 used for nuclear extraction. The materials were ground in liquid nitrogen and  
727 shaken in lysis buffer containing 50 mM HEPES (pH 7.5), 10 % glycerol, 1 %  
728 Triton X-100, 1mM EDTA (pH 7.5), 150 mM NaCl, 5 mM  $\beta$ -mercaptoethanol  
729 and protease inhibitor cocktail (Roche) for 1 h at 4°C. The lysis mixture was  
730 filtered through a 40  $\mu$ m cell strainer (BD) into fresh 50 ml tubes, nuclei were  
731 collected by centrifugation at 4°C for 20 min at 4000 g. Nuclei were then  
732 washed twice with buffer A containing 25 mM Tris-HCl (pH 7.5), 0.44 M  
733 sucrose, 10 mM MgCl<sub>2</sub>, 0.1% Triton-X and 10 mM  $\beta$ -mercaptoethanol, and  
734 washed once with buffer B containing 20 mM Tris-HCl (pH 7.5), 352 mM  
735 sucrose, 8 mM MgCl<sub>2</sub>, 0.08% Triton-X, 8 mM  $\beta$ -mercaptoethanol and 20%  
736 glycerol, then resuspended in 100  $\mu$ l of buffer B and flash frozen in liquid  
737 nitrogen. The nuclei obtained were divided into four portions for MNase  
738 treatments by incubating with 0.5 U, 1 U, 4 U and 8 U of MNase (TaKaRa  
739 2910A) in MNase digestion buffer containing 20 mM Tris-HCl (pH 8.0), 5 mM  
740 NaCl and 2.5 mM CaCl<sub>2</sub> for 20 min at 37°C. Reactions were stopped by  
741 addition of 500 mM EDTA. Digested DNA was purified and separated on 2 %  
742 agarose gel. For MNase-seq, all the nuclei were treatment with 4 U of MNase  
743 and mononucleosome-sized fragments were gel purified for sequencing library  
744 generation.

745

746 **MNase-seq analysis**

747 Approximately 1  $\mu$ g of purified mononucleosome-sized DNA fragment was  
748 used for Illumina library generation per manufacturer's instruction. Library  
749 construction and sequencing were performed by Genergy Biotechnology Co.  
750 Ltd. (Shanghai, China). Sequencing was carried out as single-end 50 bp reads  
751 on Illumina HiSeq-2000. Data analysis was carried out as previously described  
752 (Li et al. 2014). Briefly, the quality of raw reads was examined by FastQC  
753 (<http://www.bioinformatics.babraham.ac.uk/projects/fastqc/>). All clean reads  
754 were mapped to the TAIR 10 genome with the BOWTIE  
755 (<http://bowtie.cbcb.umd.edu>). Nucleosome positions were identified using the  
756 TEMPLATE FILTER software  
757 (<http://compbio.cs.huji.ac.il/NucPosition/TemplateFiltering/Home.html>).

758

### 759 **RNA-seq analysis**

760 Total RNAs were extracted from 10-day-old seedlings using the RNeasy plant  
761 mini kit (Qiagen). Yield and RNA integrity were detected by using an Agilent  
762 2100 Bioanalyzer, and RNA purity was determined by using a Nanodrop  
763 ND-1000 spectrophotometer. cDNA library construction and sequencing were  
764 performed by Beijing Genomics Institute (BGI) using BGISEQ-500 platform for  
765 50 bp single-end sequencing as previously described (Huang et al. 2018). At  
766 least 20 M clean reads of sequencing depth were obtained for each sample.  
767 Three independent biological replicates were performed. The raw reads were  
768 trimmed and quality controlled by Trimmomatic with default parameters

769 (<http://www.usadellab.org/cms/uploads/supplementary/Trimmomatic>). Then  
770 clean reads were separately aligned to *Arabidopsis thaliana* genome from  
771 TAIR 10 with orientation mode using tophat software  
772 (<http://tophat.cbcb.umd.edu/>). The level for each transcript was calculated  
773 using the fragments per kilobase of exon per million mapped reads (FPKM)  
774 method. Cuffdiff (<http://cufflinks.cbcb.umd.edu/>) was used for differential  
775 expression analysis. GO functional enrichment analysis was carried out by  
776 Goatools (<https://github.com/tanghaibao/Goatools>). The differential expression  
777 analysis was run using the classical normalization method DESeq2 R package  
778 (Love Huber and Anders 2014) with a 0.05 *p*-value, 0.05 false discovery rate,  
779 and cutoff of 1 log-fold change. The hypergeometric test was performed as  
780 previously described (Wollmann et al. 2017).

781

## 782 **DNA methylation analysis**

783 For whole genome bisulfite sequencing (WGBS), genomic DNA (gDNA) was  
784 extracted from 10-day-old seedlings with the DNeasy plant mini kit (Qiagen)  
785 per manufacturer's introduction. Library construction and sequencing were  
786 performed by Beijing Genomics Institute (BGI) using Illumina HiSeq-2000 for  
787 100 bp paired-end sequencing. The raw paired end reads were trimmed and  
788 quality controlled by SeqPrep (<https://github.com/jstjohn/SeqPrep>) and Sickle  
789 (<https://github.com/najoshi/sickle>) with default parameters. All clean reads  
790 were mapped to the TAIR 10 genome with the BSMAP aligner



791 (<http://code.google.com/p/bsmap/>) allowing up to 2 mismatches. Uniquely  
792 mapped reads were used to determine the cytosine methylation levels as  
793 previously stated (Lister, O'Malley, Tonti-Filippini, Gregory, Berry, Millar and  
794 Ecker 2008).

795

#### 796 **Data access**

797 The Hi-C, WGBS and RNA-seq datasets have been submitted to NCBI  
798 (PRJNA680865), and MNase-seq datasets have been submitted to NCBI  
799 (PRJNA695028).

800

#### 801 **Competing interest statement**

802 The authors declare no competing interests.

803

#### 804 **Acknowledgments**

805 This work was supported by National Natural Science Foundation of China  
806 (31871230 to Y.F. and 31971334 to Z.S.).

807 *Author contributions:* Z.S. and Y.F. designed and performed experiments,  
808 analyzed data, and wrote the manuscript. M.L. generated *h1* mutants,  
809 acquired DNA methylation and RNA-seq data. Y.W. helped data analysis. H. Z.  
810 performed Hi-C experiments.

811

812

## 813 **References**

- 814 Arabidopsis Genome Initiative. 2000. Analysis of the genome sequence of the flowering plant  
815 *Arabidopsis thaliana*. *Nature* **408**: 796-815.
- 816 Ascenzi, R. and J.S. Gantt. 1997. A drought-stress-inducible histone gene in *Arabidopsis thaliana* is a  
817 member of a distinct class of plant linker histone variants. *Plant Mol Biol* **34**: 629-641.
- 818 Ausio, J. 1992. Structure and dynamics of transcriptionally active chromatin. *J Cell Sci* **102 (Pt 1)**: 1-5.
- 819 Azad, G.K., K. Ito, B.S. Sailaja, A. Biran, M. Nissim-Rafinia, Y. Yamada, D.T. Brown, T. Takizawa,  
820 and E. Meshorer. 2018. PARP1-dependent eviction of the linker histone H1 mediates immediate  
821 early gene expression during neuronal activation. *J Cell Biol* **217**: 473-481.
- 822 Barra, J.L., L. Rhounim, J.L. Rossignol, and G. Faugeron. 2000. Histone H1 is dispensable for  
823 methylation-associated gene silencing in *Ascobolus immersus* and essential for long life span. *Mol*  
824 *Cell Biol* **20**: 61-69.
- 825 Baubec, T., D.F. Colombo, C. Wirbelauer, J. Schmidt, L. Burger, A.R. Krebs, A. Akalin, and D.  
826 Schubeler. 2015. Genomic profiling of DNA methyltransferases reveals a role for DNMT3B in  
827 genic methylation. *Nature* **520**: 243-247.
- 828 Bednar, J., R.A. Horowitz, S.A. Grigoryev, L.M. Carruthers, J.C. Hansen, A.J. Koster, and C.L.  
829 Woodcock. 1998. Nucleosomes, linker DNA, and linker histone form a unique structural motif  
830 that directs the higher-order folding and compaction of chromatin. *Proc Natl Acad Sci U S A* **95**:  
831 14173-14178.
- 832 Buonaccorsi, J.P. G. Romeo and M. Thoresen. 2018. Model-based bootstrapping when correcting for  
833 measurement error with application to logistic regression. *Biometrics* **74**: 135-144.
- 834 Catez, F. and R. Hock. 2010. Binding and interplay of HMG proteins on chromatin: lessons from live  
835 cell imaging. *Biochim Biophys Acta* **1799**: 15-27.
- 836 Charbonnel, C., O. Rymarenko, I.O. Da, F. Benyahya, C.I. White, F. Butter, and S. Amiard. 2018. The  
837 Linker Histone GH1-HMGA1 Is Involved in Telomere Stability and DNA Damage Repair. *Plant*  
838 *Physiol* **177**: 311-327.
- 839 Choi, J., D.B. Lyons, M.Y. Kim, J.D. Moore, and D. Zilberman. 2020. DNA Methylation and Histone  
840 H1 Jointly Repress Transposable Elements and Aberrant Intragenic Transcripts. *Mol Cell* **77**:  
841 310-323.
- 842 Clough, S.J. and A.F. Bent. 1998. Floral dip: a simplified method for *Agrobacterium*-mediated  
843 transformation of *Arabidopsis thaliana*. *Plant J* **16**: 735-743.
- 844 Cohen, A. and E.A. Bray. 1990. Characterization of three mRNAs that accumulate in wilted tomato  
845 leaves in response to elevated levels of endogenous abscisic acid. *Planta* **182**: 27-33.
- 846 Cohen, A., A.L. Plant, M.S. Moses, and E.A. Bray. 1991. Organ-Specific and Environmentally  
847 Regulated Expression of Two Abscisic Acid-Induced Genes of Tomato: Nucleotide Sequence and  
848 Analysis of the Corresponding cDNAs. *Plant Physiol* **97**: 1367-1374.
- 849 Dixon, J.R., S. Selvaraj, F. Yue, A. Kim, Y. Li, Y. Shen, M. Hu, J.S. Liu, and B. Ren. 2012.  
850 Topological domains in mammalian genomes identified by analysis of chromatin interactions.  
851 *Nature* **485**: 376-380.
- 852 Dong, P., X. Tu, P.Y. Chu, P. Lu, N. Zhu, D. Grierson, Du B, P. Li, and S. Zhong. 2017. 3D Chromatin  
853 Architecture of Large Plant Genomes Determined by Local A/B Compartments. *Mol Plant* **10**:  
854 1497-1509.
- 855 Drabent, B., P. Saftig, C. Bode, and D. Doenecke. 2000. Spermatogenesis proceeds normally in mice  
856 without linker histone H1t. *Histochem Cell Biol* **113**: 433-442.

- 857 Du J, L.M. Johnson, S.E. Jacobsen, and D.J. Patel. 2015. DNA methylation pathways and their  
858 crosstalk with histone methylation. *Nat Rev Mol Cell Biol* **16**: 519-532.
- 859 Durand, N.C., M.S. Shamim, I. Machol, S.S. Rao, M.H. Huntley, E.S. Lander, and E.L. Aiden. 2016.  
860 Juicer Provides a One-Click System for Analyzing Loop-Resolution Hi-C Experiments. *Cell Syst*  
861 **3**: 95-98.
- 862 Fan, Y., A. Sirotkin, R.G. Russell, J. Ayala, and A.I. Skoultchi. 2001. Individual somatic H1 subtypes  
863 are dispensable for mouse development even in mice lacking the H1(0) replacement subtype. *Mol*  
864 *Cell Biol* **21**: 7933-7943.
- 865 Fan, Y., T. Nikitina, E.M. Morin-Kensicki, J. Zhao, T.R. Magnuson, C.L. Woodcock, and A.I.  
866 Skoultchi. 2003. H1 linker histones are essential for mouse development and affect nucleosome  
867 spacing in vivo. *Mol Cell Biol* **23**: 4559-4572.
- 868 Fan, Y., T. Nikitina, J. Zhao, T.J. Fleury, R. Bhattacharyya, E.E. Bouhassira, A. Stein, C.L. Woodcock,  
869 and A.I. Skoultchi. 2005. Histone H1 depletion in mammals alters global chromatin structure but  
870 causes specific changes in gene regulation. *Cell* **123**: 1199-1212.
- 871 Fang, Y. and D.L. Spector. 2007. Identification of nuclear dicing bodies containing proteins for  
872 microRNA biogenesis in living *Arabidopsis* plants. *Curr Biol* **17**: 818-823.
- 873 Fang, Y. and D.L. Spector. 2010. Live cell imaging of plants. *Cold Spring Harb Protoc* **2010**: p68.
- 874 Fantz, D.A., W.R. Hatfield, G. Horvath, M.K. Kistler, and W.S. Kistler. 2001. Mice with a targeted  
875 disruption of the H1t gene are fertile and undergo normal changes in structural chromosomal  
876 proteins during spermiogenesis. *Biol Reprod* **64**: 425-431.
- 877 Feng, S., S.J. Cokus, V. Schubert, J. Zhai, M. Pellegrini, and S.E. Jacobsen. 2014. Genome-wide Hi-C  
878 analyses in wild-type and mutants reveal high-resolution chromatin interactions in *Arabidopsis*.  
879 *Mol Cell* **55**: 694-707.
- 880 Feng, Z., B. Zhang, W. Ding, X. Liu, D.L. Yang, P. Wei, F. Cao, S. Zhu, F. Zhang, and Y. Mao et al.  
881 2013. Efficient genome editing in plants using a CRISPR/Cas system. *Cell Res* **23**: 1229-1232.
- 882 Fortin, J.P. and K.D. Hansen. 2015. Reconstructing A/B compartments as revealed by Hi-C using  
883 long-range correlations in epigenetic data. *Genome Biol* **16**: 180.
- 884 Fransz, P.F., S. Armstrong, J.H. de Jong, L.D. Parnell, C. van Drunen, C. Dean, P. Zabel, T. Bisseling,  
885 and G.H. Jones. 2000. Integrated cytogenetic map of chromosome arm 4S of *A. thaliana*:  
886 structural organization of heterochromatic knob and centromere region. *Cell* **100**: 367-376.
- 887 Gantt, J.S. and T.R. Lenvik. 1991. *Arabidopsis thaliana* H1 histones. Analysis of two members of a  
888 small gene family. *Eur J Biochem* **202**: 1029-1039.
- 889 Geeven, G., Y. Zhu, B.J. Kim, B.A. Bartholdy, S.M. Yang, T.S. Macfarlan, W.D. Gifford, S.L. Pfaff,  
890 M.J. Versteegen, and H. Pinto et al. 2015. Local compartment changes and regulatory landscape  
891 alterations in histone H1-depleted cells. *Genome Biol* **16**: 289.
- 892 Godde, J.S. and K. Ura. 2009. Dynamic alterations of linker histone variants during development. *Int J*  
893 *Dev Biol* **53**: 215-224.
- 894 Grob, S. M.W. Schmid and U. Grossniklaus. 2014. Hi-C analysis in *Arabidopsis* identifies the KNOT,  
895 a structure with similarities to the flamenco locus of *Drosophila*. *Mol Cell* **55**: 678-693.
- 896 Grob, S., M.W. Schmid, N.W. Luedtke, T. Wicker, and U. Grossniklaus. 2013. Characterization of  
897 chromosomal architecture in *Arabidopsis* by chromosome conformation capture. *Genome Biol* **14**:  
898 R129.
- 899 Harris, C.J., M. Scheibe, S.P. Wongpalee, W. Liu, E.M. Cornett, R.M. Vaughan, X. Li, W. Chen, Y.  
900 Xue, and Z. Zhong et al. 2018. A DNA methylation reader complex that enhances gene

- 901 transcription. *Science* **362**: 1182-1186.
- 902 Herrera, J.E., K.L. West, R.L. Schiltz, Y. Nakatani, and M. Bustin. 2000. Histone H1 is a specific  
903 repressor of core histone acetylation in chromatin. *Mol Cell Biol* **20**: 523-529.
- 904 Huang, Y., Z. Xu, S. Xiong, G. Qin, F. Sun, J. Yang, T.F. Yuan, L. Zhao, K. Wang, and Y.X. Liang et  
905 al. 2018. Dual extra-retinal origins of microglia in the model of retinal microglia repopulation.  
906 *Cell Discov* **4**: 9.
- 907 Huff, J.T. and D. Zilberman. 2014. Dnmt1-independent CG methylation contributes to nucleosome  
908 positioning in diverse eukaryotes. *Cell* **156**: 1286-1297.
- 909 Jin, F., Y. Li, J.R. Dixon, S. Selvaraj, Z. Ye, A.Y. Lee, C.A. Yen, A.D. Schmitt, C.A. Espinoza, and B.  
910 Ren. 2013. A high-resolution map of the three-dimensional chromatin interactome in human cells.  
911 *Nature* **503**: 290-294.
- 912 Kornberg, R.D. 1974. Chromatin structure: a repeating unit of histones and DNA. *Science* **184**:  
913 868-871.
- 914 Kowalski, A. and J. Palyga. 2012. Linker histone subtypes and their allelic variants. *Cell Biol Int* **36**:  
915 981-996.
- 916 Krishnakumar, R., M.J. Gamble, K.M. Frizzell, J.G. Berrocal, M. Kininis, and W.L. Kraus. 2008.  
917 Reciprocal binding of PARP-1 and histone H1 at promoters specifies transcriptional outcomes.  
918 *Science* **319**: 819-821.
- 919 Langmead, B. and S.L. Salzberg. 2012. Fast gapped-read alignment with Bowtie 2. *Nat Methods* **9**:  
920 357-359.
- 921 Law, J.A. and S.E. Jacobsen. 2010. Establishing, maintaining and modifying DNA methylation  
922 patterns in plants and animals. *Nat Rev Genet* **11**: 204-220.
- 923 Lee, C.K., Y. Shibata, B. Rao, B.D. Strahl, and J.D. Lieb. 2004. Evidence for nucleosome depletion at  
924 active regulatory regions genome-wide. *Nat Genet* **36**: 900-905.
- 925 Lee, J.Y. and T.H. Lee. 2012. Effects of DNA methylation on the structure of nucleosomes. *J Am*  
926 *Chem Soc* **134**: 173-175.
- 927 Li, G., S. Liu, J. Wang, J. He, H. Huang, Y. Zhang, and L. Xu. 2014. ISWI proteins participate in the  
928 genome-wide nucleosome distribution in Arabidopsis. *Plant J* **78**: 706-714.
- 929 Lieberman-Aiden, E., N.L. van Berkum, L. Williams, M. Imakaev, T. Ragozy, A. Telling, I. Amit,  
930 B.R. Lajoie, P.J. Sabo, and M.O. Dorschner et al. 2009. Comprehensive mapping of long-range  
931 interactions reveals folding principles of the human genome. *Science* **326**: 289-293.
- 932 Lin, D., P. Hong, S. Zhang, W. Xu, M. Jamal, K. Yan, Y. Lei, L. Li, Y. Ruan, and Z.F. Fu et al. 2018.  
933 Digestion-ligation-only Hi-C is an efficient and cost-effective method for chromosome  
934 conformation capture. *Nat Genet* **50**: 754-763.
- 935 Lin, Q. A. Sirotkin and A.I. Skoultchi. 2000. Normal spermatogenesis in mice lacking the  
936 testis-specific linker histone H1t. *Mol Cell Biol* **20**: 2122-2128.
- 937 Lister, R., R.C. O'Malley, J. Tonti-Filippini, B.D. Gregory, C.C. Berry, A.H. Millar, and J.R. Ecker.  
938 2008. Highly integrated single-base resolution maps of the epigenome in *Arabidopsis*. *Cell* **133**:  
939 523-536.
- 940 Liu, C., C. Wang, G. Wang, C. Becker, M. Zaidem, and D. Weigel. 2016. Genome-wide analysis of  
941 chromatin packing in *Arabidopsis thaliana* at single-gene resolution. *Genome Res* **26**: 1057-1068.
- 942 Liu, C., Y.J. Cheng, J.W. Wang, and D. Weigel. 2017. Prominent topologically associated domains  
943 differentiate global chromatin packing in rice from Arabidopsis. *Nat Plants* **3**: 742-748.
- 944 Love, M.I. W. Huber and S. Anders. 2014. Moderated estimation of fold change and dispersion for

- 945 RNA-seq data with DESeq2. *Genome Biol* **15**: 550.
- 946 Luger, K., A.W. Mader, R.K. Richmond, D.F. Sargent, and T.J. Richmond. 1997. Crystal structure of  
947 the nucleosome core particle at 2.8 Å resolution. *Nature* **389**: 251-260.
- 948 Lyons, D.B. and D. Zilberman. 2017. DDM1 and Lsh remodelers allow methylation of DNA wrapped  
949 in nucleosomes. *Elife* **6**.
- 950 Maclean, J.A., A. Bettegowda, B.J. Kim, C.H. Lou, S.M. Yang, A. Bhardwaj, S. Shanker, Z. Hu, Y.  
951 Fan, and S. Eckardt et al. 2011. The rhox homeobox gene cluster is imprinted and selectively  
952 targeted for regulation by histone h1 and DNA methylation. *Mol Cell Biol* **31**: 1275-1287.
- 953 Meaburn, K.J. and T. Misteli. 2007. Cell biology: chromosome territories. *Nature* **445**: 379-781.
- 954 Mukherjee, A. and R.N. Mukherjee. 1988. Kinetic regulation of hexokinase activity in a heterogeneous  
955 branched bienzyme system. *Biochim Biophys Acta* **954**: 126-136.
- 956 Nora, E.P., B.R. Lajoie, E.G. Schulz, L. Giorgetti, I. Okamoto, N. Servant, T. Piolot, N.L. van Berkum,  
957 J. Meisig, and J. Sedat et al. 2012. Spatial partitioning of the regulatory landscape of the  
958 X-inactivation centre. *Nature* **485**: 381-385.
- 959 Ozturk, N., I. Singh, A. Mehta, T. Braun, and G. Barreto. 2014. HMGA proteins as modulators of  
960 chromatin structure during transcriptional activation. *Front Cell Dev Biol* **2**: 5.
- 961 Parnell, T.J. J.T. Huff and B.R. Cairns. 2008. RSC regulates nucleosome positioning at Pol II genes  
962 and density at Pol III genes. *EMBO J* **27**: 100-110.
- 963 Phillips, J.E. and V.G. Corces. 2009. CTCF: master weaver of the genome. *Cell* **137**: 1194-1211.
- 964 Pontvianne, F., M.C. Carpentier, N. Durut, V. Pavlistova, K. Jaske, S. Schorova, H. Parrinello, M.  
965 Rohmer, C.S. Pikaard, and M. Fojtova et al. 2016. Identification of Nucleolus-Associated  
966 Chromatin Domains Reveals a Role for the Nucleolus in 3D Organization of the *A. thaliana*  
967 Genome. *Cell Rep* **16**: 1574-1587.
- 968 Przewloka, M.R., A.T. Wierzbicki, J. Slusarczyk, M. Kuras, K.D. Grasser, C. Stemmer, and A.  
969 Jerzmanowski. 2002. The "drought-inducible" histone H1s of tobacco play no role in male sterility  
970 linked to alterations in H1 variants. *Planta* **215**: 371-379.
- 971 Rabanal, F.A., T. Mandakova, L.M. Soto-Jimenez, R. Greenhalgh, D.L. Parrott, S. Lutzmayer, J.G.  
972 Steffen, V. Nizhynska, R. Mott, and M.A. Lysak et al. 2017. Epistatic and allelic interactions  
973 control expression of ribosomal RNA gene clusters in *Arabidopsis thaliana*. *Genome Biol* **18**: 75.
- 974 Rao, S.S., M.H. Huntley, N.C. Durand, E.K. Stamenova, I.D. Bochkov, J.T. Robinson, A.L. Sanborn, I.  
975 Machol, A.D. Omer, and E.S. Lander et al. 2014. A 3D map of the human genome at kilobase  
976 resolution reveals principles of chromatin looping. *Cell* **159**: 1665-1680.
- 977 Rea, M., W. Zheng, M. Chen, C. Braud, D. Bhangu, T.N. Rognan, and W. Xiao. 2012. Histone H1  
978 affects gene imprinting and DNA methylation in *Arabidopsis*. *Plant J* **71**: 776-786.
- 979 Russanova, V.R. C.T. Driscoll and B.H. Howard. 1995. Adenovirus type 2 preferentially stimulates  
980 polymerase III transcription of Alu elements by relieving repression: a potential role for chromatin.  
981 *Mol Cell Biol* **15**: 4282-4290.
- 982 Rutowicz, K., M. Lirski, B. Mermaz, G. Teano, J. Schubert, I. Mestiri, M.A. Kroten, T.N. Fabrice, S.  
983 Fritz, and S. Grob et al. 2019. Linker histones are fine-scale chromatin architects modulating  
984 developmental decisions in *Arabidopsis*. *Genome Biol* **20**: 157.
- 985 Rutowicz, K., M. Puzio, J. Halibart-Puzio, M. Lirski, M. Kotlinski, M.A. Kroten, L. Knizewski, B.  
986 Lange, A. Muszewska, and K. Sniegowska-Swierk et al. 2015. A Specialized Histone H1 Variant  
987 Is Required for Adaptive Responses to Complex Abiotic Stress and Related DNA Methylation in  
988 *Arabidopsis*. *Plant Physiol* **169**: 2080-2101.

- 989 Sala, A., M. Toto, L. Pinello, A. Gabriele, V. Di Benedetto, A.M. Ingrassia, B.G. Lo, V. Di Gesu, R.  
990 Giancarlo, and D.F. Corona. 2011. Genome-wide characterization of chromatin binding and  
991 nucleosome spacing activity of the nucleosome remodelling ATPase ISWI. *EMBO J* **30**:  
992 1766-1777.
- 993 Servant, N., N. Varoquaux, B.R. Lajoie, E. Viara, C.J. Chen, J.P. Vert, E. Heard, J. Dekker, and E.  
994 Barillot. 2015. HiC-Pro: an optimized and flexible pipeline for Hi-C data processing. *Genome Biol*  
995 **16**: 259.
- 996 Seymour, M., L. Ji, A.M. Santos, M. Kamei, T. Sasaki, E.Y. Basenko, R.J. Schmitz, X. Zhang, and Z.A.  
997 Lewis. 2016. Histone H1 Limits DNA Methylation in *Neurospora crassa*. *G3 (Bethesda)* **6**:  
998 1879-1889.
- 999 Shi, L., J. Wang, F. Hong, D.L. Spector, and Y. Fang. 2011. Four amino acids guide the assembly or  
1000 disassembly of *Arabidopsis* histone H3.3-containing nucleosomes. *Proc Natl Acad Sci U S A* **108**:  
1001 10574-10578.
- 1002 Sirotkin, A.M., W. Edelmann, G. Cheng, A. Klein-Szanto, R. Kucherlapati, and A.I. Skoultchi. 1995.  
1003 Mice develop normally without the H1(0) linker histone. *Proc Natl Acad Sci U S A* **92**:  
1004 6434-6438.
- 1005 Song, F., P. Chen, D. Sun, M. Wang, L. Dong, D. Liang, R.M. Xu, P. Zhu, and G. Li. 2014. Cryo-EM  
1006 study of the chromatin fiber reveals a double helix twisted by tetranucleosomal units. *Science* **344**:  
1007 376-380.
- 1008 Sun, L., Y. Jing, X. Liu, Q. Li, Z. Xue, Z. Cheng, D. Wang, H. He, and W. Qian. 2020. Heat  
1009 stress-induced transposon activation correlates with 3D chromatin organization rearrangement in  
1010 *Arabidopsis*. *Nat Commun* **11**: 1886.
- 1011 Thoma, F. T. Koller and A. Klug. 1979. Involvement of histone H1 in the organization of the  
1012 nucleosome and of the salt-dependent superstructures of chromatin. *J Cell Biol* **83**: 403-427.
- 1013 Wang, C., C. Liu, D. Roqueiro, D. Grimm, R. Schwab, C. Becker, C. Lanz, and D. Weigel. 2015.  
1014 Genome-wide analysis of local chromatin packing in *Arabidopsis thaliana*. *Genome Res* **25**:  
1015 246-256.
- 1016 Wei, T. and M.A. O'Connell. 1996. Structure and characterization of a putative drought-inducible H1  
1017 histone gene. *Plant Mol Biol* **30**: 255-268.
- 1018 Weiner, A., A. Hughes, M. Yassour, O.J. Rando, and N. Friedman. 2010. High-resolution nucleosome  
1019 mapping reveals transcription-dependent promoter packaging. *Genome Res* **20**: 90-100.
- 1020 Wierzbicki, A.T. and A. Jerzmanowski. 2005. Suppression of histone H1 genes in *Arabidopsis* results  
1021 in heritable developmental defects and stochastic changes in DNA methylation. *Genetics* **169**:  
1022 997-1008.
- 1023 Willcockson, M.A., S.E. Heaton, C.N. Weiss, B.A. Bartholdy, Y. Botbol, L.N. Mishra, D.S. Sidhwani,  
1024 T.J. Wilson, H.B. Pinto, and M.I. Maron et al. 2020. H1 histones control the epigenetic landscape  
1025 by local chromatin compaction. *Nature* **589**: 293-298.
- 1026 Wollmann, H., H. Stroud, R. Yelagandula, Y. Tarutani, D. Jiang, L. Jing, B. Jamge, H. Takeuchi, S.  
1027 Holec, and X. Nie et al. 2017. The histone H3 variant H3.3 regulates gene body DNA methylation  
1028 in *Arabidopsis thaliana*. *Genome Biol* **18**: 94.
- 1029 Yan, L., S. Wei, Y. Wu, R. Hu, H. Li, W. Yang, and Q. Xie. 2015. High-Efficiency Genome Editing in  
1030 *Arabidopsis* Using YAO Promoter-Driven CRISPR/Cas9 System. *Mol Plant* **8**: 1820-1823.
- 1031 Yang, S.M., B.J. Kim, T.L. Norwood, and A.I. Skoultchi. 2013. H1 linker histone promotes epigenetic  
1032 silencing by regulating both DNA methylation and histone H3 methylation. *Proc Natl Acad Sci U*



- 1033            *S A* **110**: 1708-1713.
- 1034    Yuan, G.C., Y.J. Liu, M.F. Dion, M.D. Slack, L.F. Wu, S.J. Altschuler, and O.J. Rando. 2005.
- 1035            Genome-scale identification of nucleosome positions in *S. cerevisiae*. *Science* **309**: 626-630.
- 1036    Yusufova, N., A. Kloetgen, M. Teater, A. Osunsade, J.M. Camarillo, C.R. Chin, A.S. Doane, B.J.
- 1037            Venters, S. Portillo-Ledesma, and J. Conway et al. 2020. Histone H1 loss drives lymphoma by
- 1038            disrupting 3D chromatin architecture. *Nature* **589**: 299–305.
- 1039    Yusufova, N., A. Kloetgen, M. Teater, A. Osunsade, J.M. Camarillo, C.R. Chin, A.S. Doane, B.J.
- 1040    Zemach, A., I.E. McDaniel, P. Silva, and D. Zilberman. 2010. Genome-wide evolutionary analysis of
- 1041            eukaryotic DNA methylation. *Science* **328**: 916-919.
- 1042    Zemach, A., M.Y. Kim, P.H. Hsieh, D. Coleman-Derr, L. Eshed-Williams, K. Thao, S.L. Harmer, and
- 1043            D. Zilberman. 2013. The *Arabidopsis* nucleosome remodeler DDM1 allows DNA
- 1044            methyltransferases to access H1-containing heterochromatin. *Cell* **153**: 193-205.
- 1045    Zhang, H., R. Zheng, Y. Wang, Y. Zhang, P. Hong, Y. Fang, G. Li, and Y. Fang. 2019. The effects of
- 1046            *Arabidopsis* genome duplication on the chromatin organization and transcriptional regulation.
- 1047            *Nucleic Acids Res* **47**: 7857-7869.
- 1048    Zhang, L., W.J. Xie, S. Liu, L. Meng, C. Gu, and Y.Q. Gao. 2017. DNA Methylation Landscape
- 1049            Reflects the Spatial Organization of Chromatin in Different Cells. *Biophys J* **113**: 1395-1404.
- 1050
